# Supplementary material
Source: PubMed Central journal article supplement (PMC3754778)
Supplement: NIHMS484751-supplement-ESI.pdf [file NIHMS484751-supplement-ESI.pdf]

Supplemental Figure 1:

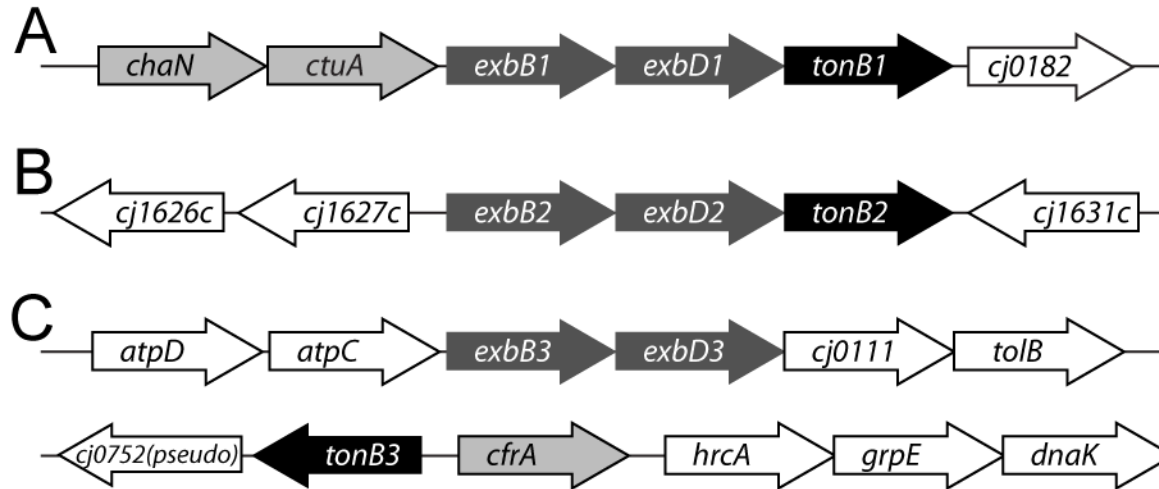

Genomic locations of *tonB1* (A), *tonB2* (B) and *tonB3* (C) and their corresponding *exbB/exbD* complexes in *Campylobacter jejuni* NCTC11168. TonB genes are in black, *exbB/exbD* in dark grey and miscellaneous iron related genes in light grey. The *tonB3* gene is unique as compared to other *C. jejuni* *tonB* genes as *tonB3* is transcribed separately from its corresponding *exbB3/exbD3* complexes. To note, *cj0752* is a pseudogene in *C. jejuni* NCTC11168
